# Supplementary material for: Is there a role for humidified heated high-flow nasal cannula therapy in paediatric emergency departments?
Source: HighWire-hosted journal article supplement (doi:10.1136/emermed-2015-204914), 2016-01-04
Supplement: emermed-2015-204914supp2.pdf [file emermed-2015-204914supp2.pdf]

## Audit of High Flow Nasal Prong Oxygen Therapy

### HFNP AUDIT

CRF 1- Treating Clinician's Report

Your name:

Supervising consultant:

Enrollment # (*office use only*):

*Attach patient identification sticker here*

### DEMOGRAPHICS

Age:                      Weight:

Diagnosis:

Date / Time HFNP commenced:

### RESPIRATORY THERAPY PRIOR TO HFNP

None                      Low flow NP oxygen

Face mask oxygen      Nasopharyngeal CPAP

Mask CPAP/BiPAP

### BASELINE DATA (before starting HFNP)

RR:                      HR:                      SpO<sub>2</sub>:

Respiratory Distress (mild/mod/severe):

### ADDITIONAL THERAPY

Salbutamol MDI / neb    Adrenaline neb

Atrovent MDI / neb

Steroid                      Antibiotics

Magnesium                Aminophylline

### INITIAL HFNP SETTINGS

FiO<sub>2</sub>:                      Flow rate:

### 2 HOURS AFTER STARTING HFNP THERAPY

FiO<sub>2</sub>:

Flow rate:

RR:                      HR:                      SpO<sub>2</sub>:

Respiratory Distress (mild/mod/severe):

### TOLERABILITY

Sedation during HFNP therapy (drug/dose/freq):

Enteral feeding during HFNP therapy: Oral    NG

IV fluid during HFNP therapy:    Y            N

### OUTCOME

Weaned to low flow oxygen in ED

Transferred to ICU on HFNP

Increased support to nasopharyngeal CPAP in ED

Increased support to ETT in ED

Ceased HFNP therapy (why):

### ADVERSE EVENTS

Nil

Failure of HFNP (why):

Abdominal distension

Pneumothorax

Other (specify):

### CLINICIAN SATISFACTION with HFNP

Unsatisfied

Satisfied

Very satisfied
